# Supplementary material for: Germ Line Mutations in the Thyroid Hormone Receptor Alpha Gene Predispose to Cutaneous Tags and Melanocytic Nevi
Source: PubMed Central journal article supplement (PMC8290313; doi:10.1089/thy.2020.0391), 2021-07-08
Supplement: Supp_FigS1.pdf [file Supp_FigS1.pdf]

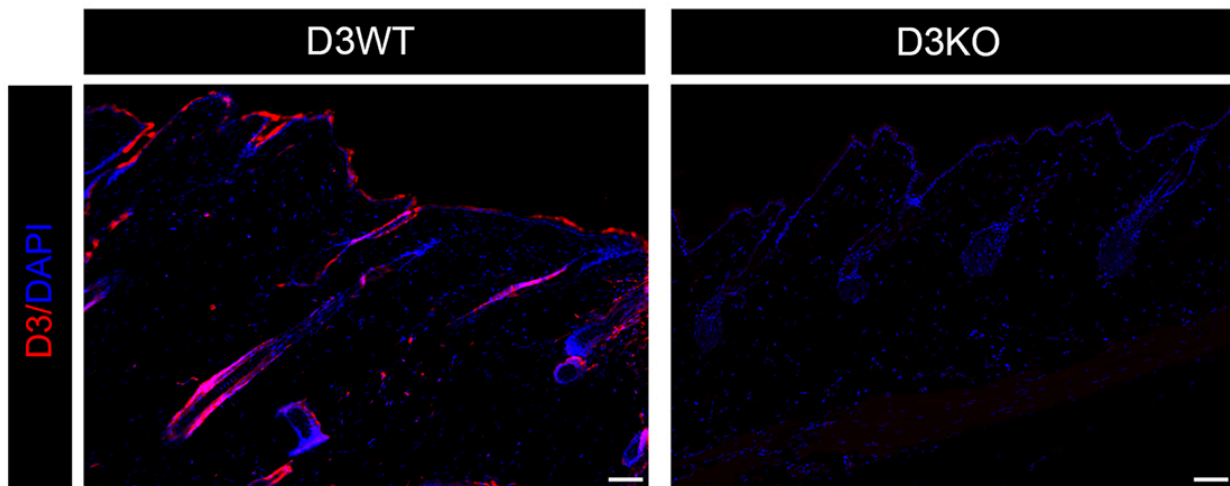

Figure S1

**Supplemental Figure 1** *Specificity of DIO3 (D3) antibody.* DIO3 antibody specificity was assessed by immunofluorescence analyses of skin from wild type (D3WT) and DIO3 knockout (D3KO) mice.
