# Supplementary material for: Germ Line Mutations in the Thyroid Hormone Receptor Alpha Gene Predispose to Cutaneous Tags and Melanocytic Nevi
Source: PubMed Central journal article supplement (PMC8290313; doi:10.1089/thy.2020.0391), 2021-07-08
Supplement: Supp_FigS2.pdf [file Supp_FigS2.pdf]

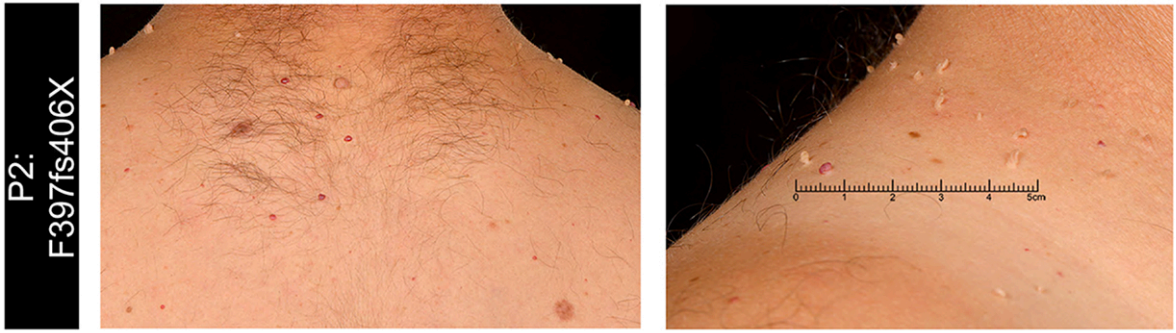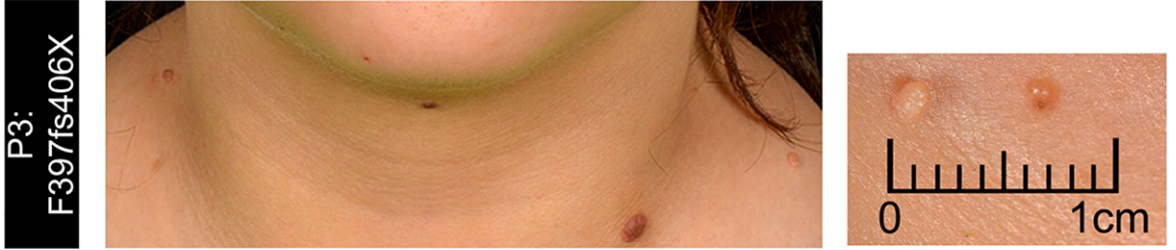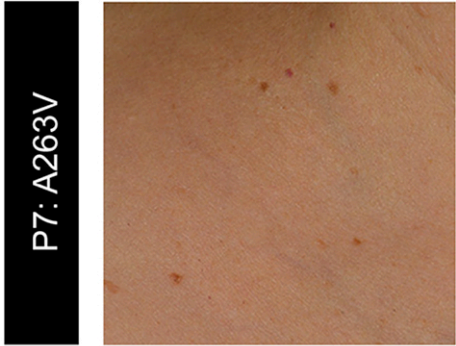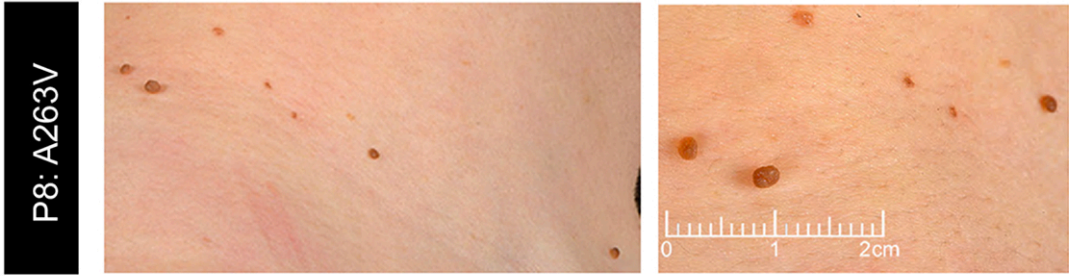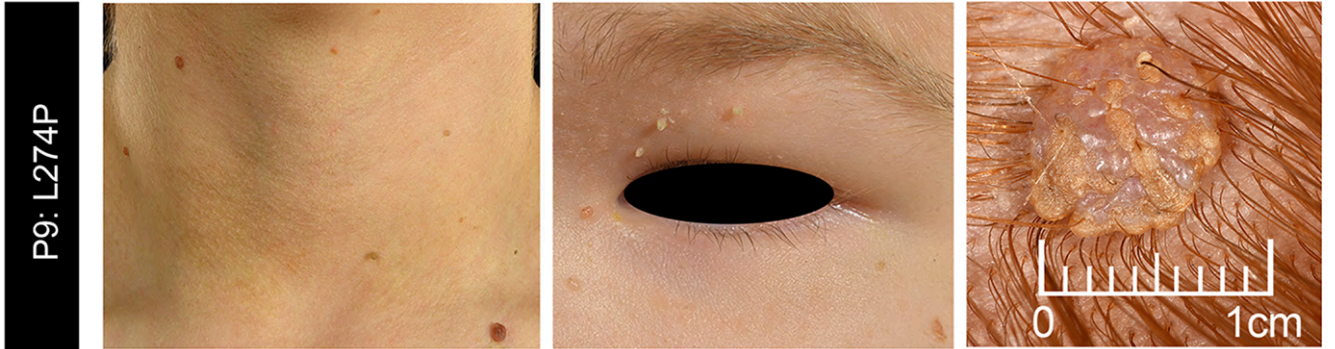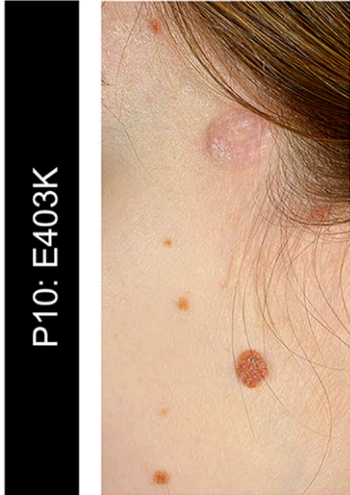

Figure S2

**Supplemental Figure 2** *RTH $\alpha$*  patients exhibit multiple skin lesions (tags and naevi).  
Representative images of skin lesions of six different patients with *THRA* mutations.
