# Supplementary material for: Germ Line Mutations in the Thyroid Hormone Receptor Alpha Gene Predispose to Cutaneous Tags and Melanocytic Nevi
Source: PubMed Central journal article supplement (PMC8290313; doi:10.1089/thy.2020.0391), 2021-07-08
Supplement: Supp_FigS3.pdf [file Supp_FigS3.pdf]

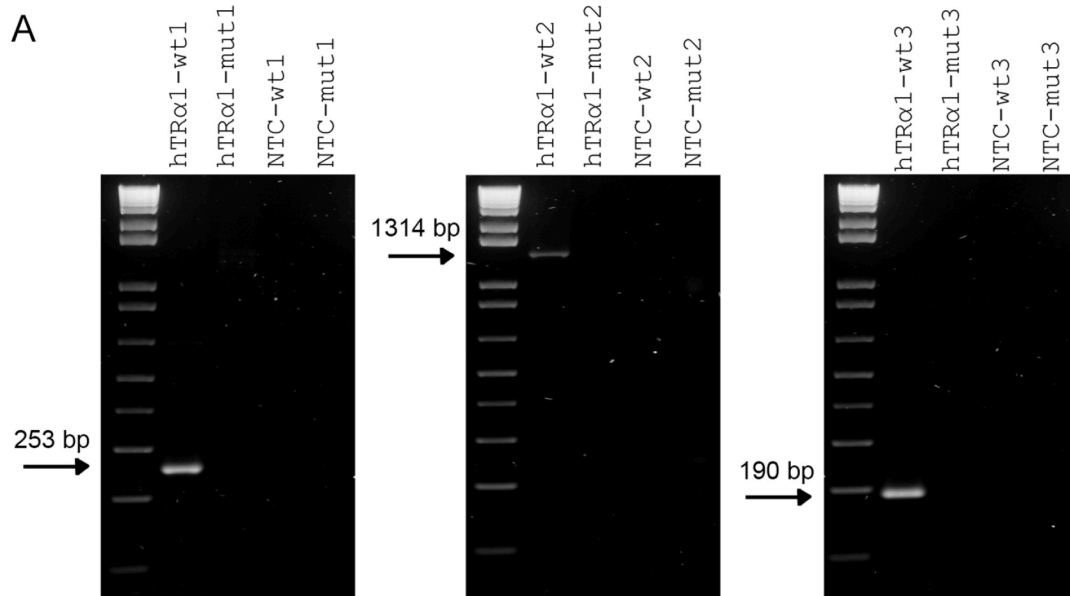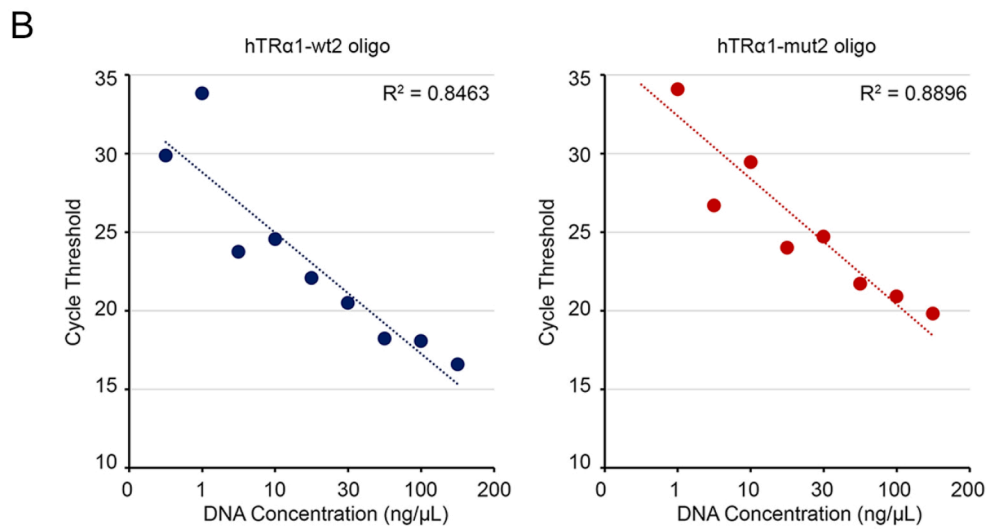

Figure S3

**Supplemental Figure 3** *Mutant THRA alleles are not expressed in wild-type skin.* (A) PCR analysis of mRNA expression levels of the wt and mut alleles in a wild-type skin sample used as a negative control. (B) Efficiencies of wild-type and mutant oligonucleotides were measured by generation of a standard curve following serial dilution of template. Progressive dilution of the template does not affect hybridization of wild-type and mutant oligonucleotides to DNA, confirming their comparable hybridization efficiency in the quantitative PCR assay.
