# Supplementary material for: Germ Line Mutations in the Thyroid Hormone Receptor Alpha Gene Predispose to Cutaneous Tags and Melanocytic Nevi
Source: PubMed Central journal article supplement (PMC8290313; doi:10.1089/thy.2020.0391), 2021-07-08
Supplement: Supp_FigS4.pdf [file Supp_FigS4.pdf]

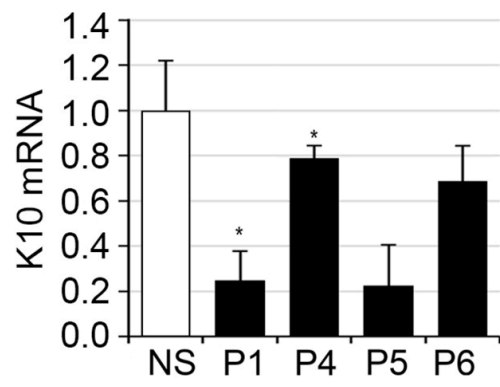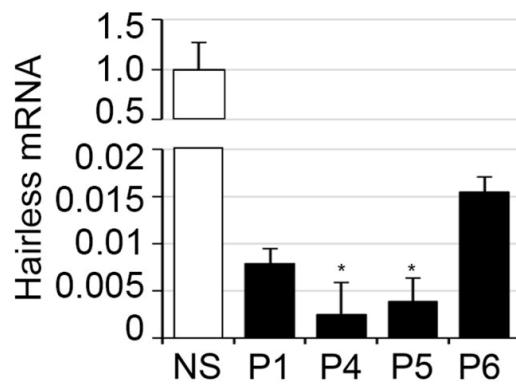

Figure S4

**Supplemental Figure 4** *Skin naevi from RTH $\alpha$  patients show reduced TH target gene expression.* Expression levels of K10 and Hairless TH-target genes measured by real-time PCR in the skin naevi from P1, P4, P5, P6 compared to normal skin (NS).
