# Supplementary material for: Germ Line Mutations in the Thyroid Hormone Receptor Alpha Gene Predispose to Cutaneous Tags and Melanocytic Nevi
Source: PubMed Central journal article supplement (PMC8290313; doi:10.1089/thy.2020.0391), 2021-07-08
Supplement: Supp_FigS5.pdf [file Supp_FigS5.pdf]

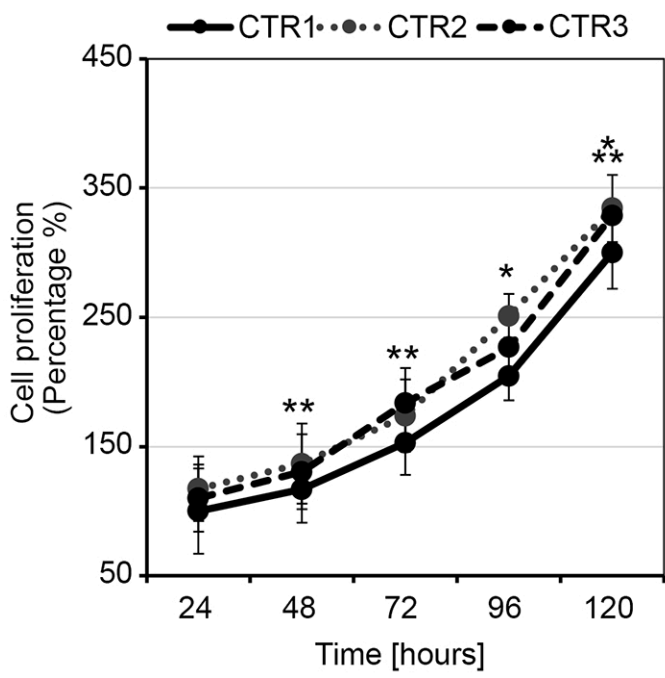

Figure S5

**Supplemental Figure 5** *Dermal fibroblasts from different control subjects exhibit similar proliferation rates.* Proliferation rates of fibroblasts derived from three different control (CTR) subjects was assessed by MTT assay at 0, 24, 48, 72, 96 and 120 hours following seeding of cells.
