# Supplementary material for: Germ Line Mutations in the Thyroid Hormone Receptor Alpha Gene Predispose to Cutaneous Tags and Melanocytic Nevi
Source: PubMed Central journal article supplement (PMC8290313; doi:10.1089/thy.2020.0391), 2021-07-08
Supplement: Supp_FigS7.pdf [file Supp_FigS7.pdf]

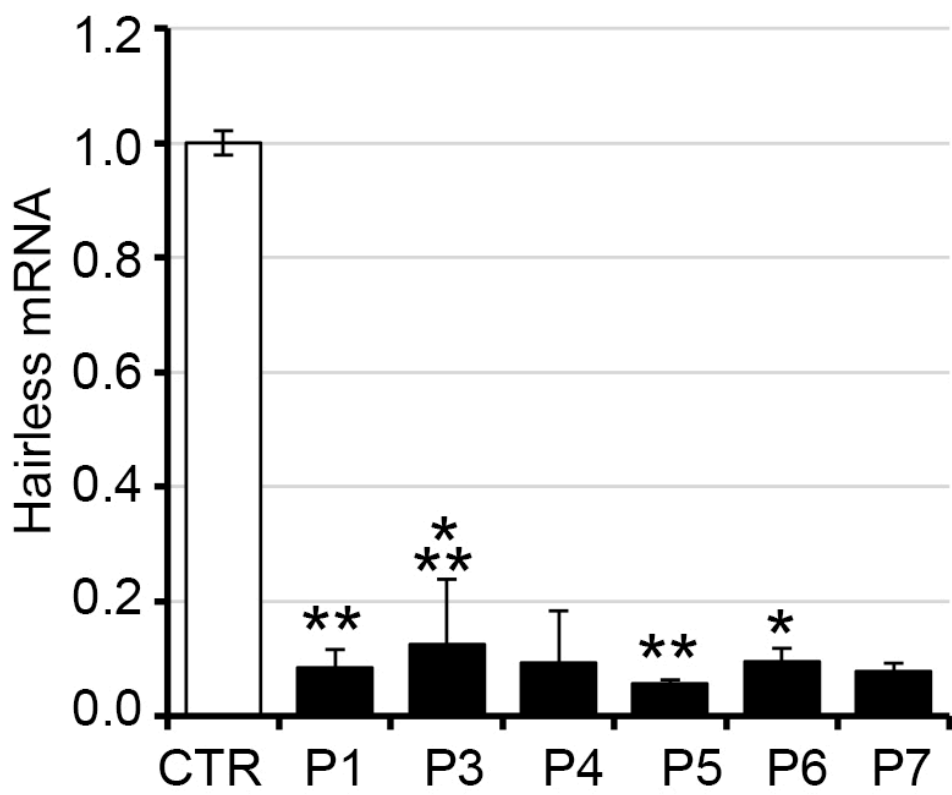

Figure S7

**Supplemental Figure 7** *Dermal fibroblasts from RTH $\alpha$  patient exhibit reduced TH target gene expression compared to control cells.* Expression of TH-target gene (Hairless) mRNA measured by Real-time PCR in dermal fibroblasts from patients P1, P3, P4, P5, P6 and P7 versus control fibroblasts.
